# Supplementary material for: MR Analysis Reveals No Causal Association Between Mitochondrial DNA Copy Number and Osteoporosis
Source: Research Square preprint supplement (doi:10.21203/rs.3.rs-5532195/v1), 2025-05-02
Supplement: Supplementary file 1 [file 8245b87b2976109c0b41c516.xlsx]

## Sheet: Table S1
Table S1. Detailed information on instrumental variables used in the MR analysis of mtDNA-CN and total BMD
SNP	chr.exposure	pos.exposure	effect_allele.exposure	other_allele.exposure	beta.exposure	se.exposure	pval.exposure	eaf.exposure	exposure	mr_keep.exposure	pval_origin.exposure	id.exposure	reliability.exposure	samplesize.exposure	chr	pos	beta.outcome	se.outcome	samplesize.outcome	pval.outcome	eaf.outcome	effect_allele.outcome	other_allele.outcome	outcome	id.outcome	originalname.outcome	outcome.deprecated	mr_keep.outcome	data_source.outcome	proxy.outcome	target_snp.outcome	proxy_snp.outcome	target_a1.outcome	target_a2.outcome	proxy_a1.outcome	proxy_a2.outcome	r2	F
rs2977608	1	768253	C	A	0.0236	0.0025	2.581e-21	0.7783	Mitochondrial DNA copy number	TRUE	reported	wDVX9G	high	395781	1	768253	-0.002	0.0098	56284	0.8382	0.7066	C	A	Total body bone mineral density	ebi-a-GCST005348	Total body bone mineral density	Total body bone mineral density || ||	TRUE	igd								0.000225108	89.1131
rs1569419	1	2996602	C	T	0.0189	0.0025	6.87e-14	0.7555	Mitochondrial DNA copy number	TRUE	reported	wDVX9G	high	395781	1	2996602	-0.0112	0.0069	56284	0.107	0.7676	C	T	Total body bone mineral density	ebi-a-GCST005348	Total body bone mineral density	Total body bone mineral density || ||	TRUE	igd								0.000144386	57.1533
rs3766744	1	12043717	A	G	-0.0179	0.0021	2.908e-17	0.4722	Mitochondrial DNA copy number	TRUE	reported	wDVX9G	high	395781	1	12043717	0.0045	0.0057	56284	0.43	0.4728	A	G	Total body bone mineral density	ebi-a-GCST005348	Total body bone mineral density	Total body bone mineral density || ||	TRUE	igd								0.000183541	72.655
rs72660908	1	25583610	G	C	0.0457	0.0021	8.25e-101	0.3877	Mitochondrial DNA copy number	TRUE	reported	wDVX9G	high	395781	1	25583610	-0.0102	0.0072	56284	0.1554	0.3708	G	C	Total body bone mineral density	ebi-a-GCST005348	Total body bone mineral density	Total body bone mineral density || ||	TRUE	igd								0.00119514	473.578
rs182346769	1	25622199	A	G	0.0213	0.0027	7.869e-15	0.0656	Mitochondrial DNA copy number	TRUE	reported	wDVX9G	high	395781	1	25622199	-0.0246	0.0243	56284	0.3115	0.0951	A	G	Total body bone mineral density	ebi-a-GCST005348	Total body bone mineral density	Total body bone mineral density || ||	TRUE	igd								0.00015722	62.2343
rs2274319	1	156450873	C	T	-0.0139	0.0022	4.087e-10	0.675	Mitochondrial DNA copy number	TRUE	reported	wDVX9G	high	395781	1	156450873	0.0063	0.0059	56284	0.2888	0.6575	C	T	Total body bone mineral density	ebi-a-GCST005348	Total body bone mineral density	Total body bone mineral density || ||	TRUE	igd								0.000100852	39.9192
rs2038480	1	171939641	T	A	0.0162	0.0027	1.389e-09	0.832	Mitochondrial DNA copy number	TRUE	reported	wDVX9G	high	395781	1	171939641	0.0044	0.0071	56284	0.5363	0.8025	T	A	Total body bone mineral density	ebi-a-GCST005348	Total body bone mineral density	Total body bone mineral density || ||	TRUE	igd								9.09511e-05	35.9998
rs9425601	1	172377262	A	G	0.0125	0.0023	3.039e-08	0.3171	Mitochondrial DNA copy number	TRUE	reported	wDVX9G	high	395781	1	172377262	0.0073	0.0061	56284	0.2318	0.3211	A	G	Total body bone mineral density	ebi-a-GCST005348	Total body bone mineral density	Total body bone mineral density || ||	TRUE	igd								7.46237e-05	29.5367
rs10749636	1	248020448	A	G	0.0155	0.0025	5.434e-10	0.7694	Mitochondrial DNA copy number	TRUE	reported	wDVX9G	high	395781	1	248020448	-0.002	0.0068	56284	0.764999	0.7436	A	G	Total body bone mineral density	ebi-a-GCST005348	Total body bone mineral density	Total body bone mineral density || ||	TRUE	igd								9.7115e-05	38.4398
rs12247015	10	60145079	G	A	0.0337	0.0021	1.276e-55	0.4245	Mitochondrial DNA copy number	TRUE	reported	wDVX9G	high	395781	10	60145079	-0.0059	0.0057	56284	0.3015	0.4314	G	A	Total body bone mineral density	ebi-a-GCST005348	Total body bone mineral density	Total body bone mineral density || ||	TRUE	igd								0.000650255	257.525
rs7896518	10	65104500	G	A	-0.0456	0.0022	9.53e-99	0.4354	Mitochondrial DNA copy number	TRUE	reported	wDVX9G	high	395781	10	65104500	-0.0039	0.0058	56284	0.5066	0.4163	G	A	Total body bone mineral density	ebi-a-GCST005348	Total body bone mineral density	Total body bone mineral density || ||	TRUE	igd								0.00108432	429.618
rs57066921	10	102752345	G	T	-0.1081	0.0081	8.984e-41	0.0189	Mitochondrial DNA copy number	TRUE	reported	wDVX9G	high	395781	10	102752345	-0.0245	0.0205	56284	0.2318	0.0356	G	T	Total body bone mineral density	ebi-a-GCST005348	Total body bone mineral density	Total body bone mineral density || ||	TRUE	igd								0.000449812	178.106
rs701834	10	102761801	T	C	-0.0254	0.0026	1.122e-22	0.1839	Mitochondrial DNA copy number	TRUE	reported	wDVX9G	high	395781	10	102761801	-0.0066	0.0068	56284	0.3364	0.2281	T	C	Total body bone mineral density	ebi-a-GCST005348	Total body bone mineral density	Total body bone mineral density || ||	TRUE	igd								0.00024108	95.4374
rs3961455	10	104421471	A	G	0.0142	0.0024	4.305e-09	0.2803	Mitochondrial DNA copy number	TRUE	reported	wDVX9G	high	395781	10	104421471	0.0136	0.0067	56284	0.0441398	0.2377	A	G	Total body bone mineral density	ebi-a-GCST005348	Total body bone mineral density	Total body bone mineral density || ||	TRUE	igd								8.84425e-05	35.0068
rs10835540	11	4071429	A	T	0.0184	0.0023	5.74e-16	0.333	Mitochondrial DNA copy number	TRUE	reported	wDVX9G	high	395781	11	4071429	0.0005	0.0062	56284	0.9301	0.3073	A	T	Total body bone mineral density	ebi-a-GCST005348	Total body bone mineral density	Total body bone mineral density || ||	TRUE	igd								0.000161679	63.9997
rs11064074	12	6281039	T	C	0.0197	0.0021	4.866e-20	0.4294	Mitochondrial DNA copy number	TRUE	reported	wDVX9G	high	395781	12	6281039	-0.0102	0.006	56284	0.0909892	0.4542	T	C	Total body bone mineral density	ebi-a-GCST005348	Total body bone mineral density	Total body bone mineral density || ||	TRUE	igd								0.000222301	88.0018
rs5012419	12	19105915	G	A	0.0247	0.0022	2.664e-29	0.5915	Mitochondrial DNA copy number	TRUE	reported	wDVX9G	high	395781	12	19105915	0.0054	0.0058	56284	0.3491	0.6133	G	A	Total body bone mineral density	ebi-a-GCST005348	Total body bone mineral density	Total body bone mineral density || ||	TRUE	igd								0.000318387	126.051
rs1127787	12	27867727	A	G	-0.0159	0.0028	1.493e-08	0.173	Mitochondrial DNA copy number	TRUE	reported	wDVX9G	high	395781	12	27867727	0.0047	0.0078	56284	0.5464	0.1585	A	G	Total body bone mineral density	ebi-a-GCST005348	Total body bone mineral density	Total body bone mineral density || ||	TRUE	igd								8.14682e-05	32.246
rs2015599	12	29435480	A	G	0.0123	0.0021	6.031e-09	0.4274	Mitochondrial DNA copy number	TRUE	reported	wDVX9G	high	395781	12	29435480	-0.0035	0.0057	56284	0.5403	0.4628	A	G	Total body bone mineral density	ebi-a-GCST005348	Total body bone mineral density	Total body bone mineral density || ||	TRUE	igd								8.6672e-05	34.3059
rs12426673	12	109490296	T	G	-0.0141	0.0021	4.028e-11	0.6233	Mitochondrial DNA copy number	TRUE	reported	wDVX9G	high	395781	12	109490296	0.0005	0.0057	56284	0.93	0.5719	T	G	Total body bone mineral density	ebi-a-GCST005348	Total body bone mineral density	Total body bone mineral density || ||	TRUE	igd								0.000113893	45.0814
rs192890685	12	120092963	T	C	0.0247	0.0044	1.932e-08	0.0557	Mitochondrial DNA copy number	TRUE	reported	wDVX9G	high	395781	12	120092963	-0.012	0.0132	56284	0.3659	0.0556	T	C	Total body bone mineral density	ebi-a-GCST005348	Total body bone mineral density	Total body bone mineral density || ||	TRUE	igd								7.96158e-05	31.5128
rs11553699	12	122216910	G	A	0.0445	0.0032	1.451e-43	0.1193	Mitochondrial DNA copy number	TRUE	reported	wDVX9G	high	395781	12	122216910	0.0188	0.0099	56284	0.0581099	0.1256	G	A	Total body bone mineral density	ebi-a-GCST005348	Total body bone mineral density	Total body bone mineral density || ||	TRUE	igd								0.000488374	193.383
rs1760940	14	20938251	C	A	0.0263	0.0024	5.196e-27	0.2455	Mitochondrial DNA copy number	TRUE	reported	wDVX9G	high	395781	14	20938251	-0.0002	0.0069	56284	0.9751	0.2351	C	A	Total body bone mineral density	ebi-a-GCST005348	Total body bone mineral density	Total body bone mineral density || ||	TRUE	igd								0.000303321	120.084
rs72698722	14	101181881	T	C	-0.0192	0.0027	1.249e-12	0.1938	Mitochondrial DNA copy number	TRUE	reported	wDVX9G	high	395781	14	101181881	0.0066	0.0072	56284	0.3635	0.197	T	C	Total body bone mineral density	ebi-a-GCST005348	Total body bone mineral density	Total body bone mineral density || ||	TRUE	igd								0.000127751	50.5676
rs289713	16	57006829	A	T	-0.0149	0.0027	4.136e-08	0.7843	Mitochondrial DNA copy number	TRUE	reported	wDVX9G	high	395781	16	57006829	-0.0014	0.0072	56284	0.8414	0.7793	A	T	Total body bone mineral density	ebi-a-GCST005348	Total body bone mineral density	Total body bone mineral density || ||	TRUE	igd								7.69408e-05	30.4539
rs2290507	17	18139089	A	G	0.0223	0.0031	3.639e-13	0.1292	Mitochondrial DNA copy number	TRUE	reported	wDVX9G	high	395781	17	18139089	-0.001	0.0085	56284	0.9062	0.1321	A	G	Total body bone mineral density	ebi-a-GCST005348	Total body bone mineral density	Total body bone mineral density || ||	TRUE	igd								0.00013073	51.7469
rs200309755	17	27845774	T	C	-0.018	0.0022	1.906e-16	0.5229	Mitochondrial DNA copy number	TRUE	reported	wDVX9G	high	395781	17	27845774	0.0014	0.0126	56284	0.9103	0.4902	T	C	Total body bone mineral density	ebi-a-GCST005348	Total body bone mineral density	Total body bone mineral density || ||	TRUE	igd								0.000169111	66.9418
rs17850455	17	62476451	G	C	0.091	0.0104	1.813e-18	0.0129	Mitochondrial DNA copy number	TRUE	reported	wDVX9G	high	395781	17	62476451	0.0038	0.0456	56284	0.9339	0.0126	G	C	Total body bone mineral density	ebi-a-GCST005348	Total body bone mineral density	Total body bone mineral density || ||	TRUE	igd								0.000193409	76.5621
rs77261872	18	42107662	T	C	0.0262	0.0032	2.281e-16	0.1431	Mitochondrial DNA copy number	TRUE	reported	wDVX9G	high	395781	18	42107662	0.001	0.0087	56284	0.9046	0.1224	T	C	Total body bone mineral density	ebi-a-GCST005348	Total body bone mineral density	Total body bone mineral density || ||	TRUE	igd								0.000169346	67.0348
rs28665408	18	67516846	C	A	0.0157	0.0021	2.11e-13	0.9761	Mitochondrial DNA copy number	TRUE	reported	wDVX9G	low	395781	18	67519180	0.0014	0.0129	56284	0.9127	0.5325	C	A	Total body bone mineral density	ebi-a-GCST005348	Total body bone mineral density	Total body bone mineral density || ||	TRUE	igd	TRUE	rs28665408	rs1790964	A	C	A	C	0.000141203	55.8931
rs11085147	19	5711930	T	C	0.0756	0.0036	1.54e-95	0.0865	Mitochondrial DNA copy number	TRUE	reported	wDVX9G	high	395781	19	5711930	0.0151	0.0103	56284	0.1416	0.0877	T	C	Total body bone mineral density	ebi-a-GCST005348	Total body bone mineral density	Total body bone mineral density || ||	TRUE	igd								0.00111301	440.998
rs6511720	19	11202306	T	G	0.0192	0.0033	4.081e-09	0.1103	Mitochondrial DNA copy number	TRUE	reported	wDVX9G	high	395781	19	11202306	0.004	0.0093	56284	0.6635	0.1179	T	G	Total body bone mineral density	ebi-a-GCST005348	Total body bone mineral density	Total body bone mineral density || ||	TRUE	igd								8.55229e-05	33.8511
rs56069439	19	17393925	A	C	-0.0274	0.0023	2.299e-32	0.2604	Mitochondrial DNA copy number	TRUE	reported	wDVX9G	high	395781	19	17393925	0.0075	0.0062	56284	0.2311	0.28	A	C	Total body bone mineral density	ebi-a-GCST005348	Total body bone mineral density	Total body bone mineral density || ||	TRUE	igd								0.000358455	141.92
rs1065853	19	45413233	T	G	0.0388	0.0039	1.585e-23	0.0626	Mitochondrial DNA copy number	TRUE	reported	wDVX9G	high	395781	19	45413233	-0.0073	0.0183	56284	0.6909	0.0824	T	G	Total body bone mineral density	ebi-a-GCST005348	Total body bone mineral density	Total body bone mineral density || ||	TRUE	igd								0.000250018	98.9765
rs1613662	19	55536595	A	G	-0.0167	0.0028	3.9e-09	0.8549	Mitochondrial DNA copy number	TRUE	reported	wDVX9G	high	395781	19	55536595	0.0062	0.0077	56284	0.4206	0.8348	A	G	Total body bone mineral density	ebi-a-GCST005348	Total body bone mineral density	Total body bone mineral density || ||	TRUE	igd								8.98717e-05	35.5725
rs62641680	2	74166053	A	G	-0.0903	0.0063	4.634e-47	0.0249	Mitochondrial DNA copy number	TRUE	reported	wDVX9G	high	395781	2	74166053	0.0124	0.0225	56284	0.5818	0.03	A	G	Total body bone mineral density	ebi-a-GCST005348	Total body bone mineral density	Total body bone mineral density || ||	TRUE	igd								0.000518817	205.443
rs74874677	2	74177777	G	A	-0.0819	0.0071	3.617e-31	0.0298	Mitochondrial DNA copy number	TRUE	reported	wDVX9G	high	395781	2	74177777	0.0254	0.0207	56284	0.2196	0.0213	G	A	Total body bone mineral density	ebi-a-GCST005348	Total body bone mineral density	Total body bone mineral density || ||	TRUE	igd								0.000336086	133.06
rs12052715	2	160677375	G	C	-0.0133	0.0024	1.72e-08	0.6938	Mitochondrial DNA copy number	TRUE	reported	wDVX9G	high	395781	2	160677375	0.0093	0.0063	56284	0.1409	0.7162	G	C	Total body bone mineral density	ebi-a-GCST005348	Total body bone mineral density	Total body bone mineral density || ||	TRUE	igd								7.75876e-05	30.7099
rs78909033	2	241510903	A	G	-0.021	0.0031	1.003e-11	0.1233	Mitochondrial DNA copy number	TRUE	reported	wDVX9G	high	395781	2	241510903	-0.006	0.0096	56284	0.534101	0.1242	A	G	Total body bone mineral density	ebi-a-GCST005348	Total body bone mineral density	Total body bone mineral density || ||	TRUE	igd								0.000115934	45.8895
rs2263663	20	1541301	T	C	0.02	0.0024	1.966e-16	0.2296	Mitochondrial DNA copy number	TRUE	reported	wDVX9G	high	395781	20	1541301	-0.0098	0.0066	56284	0.1343	0.2353	T	C	Total body bone mineral density	ebi-a-GCST005348	Total body bone mineral density	Total body bone mineral density || ||	TRUE	igd								0.000175431	69.4441
rs156355	20	1818613	C	T	0.0214	0.0022	6.411e-23	0.496	Mitochondrial DNA copy number	TRUE	reported	wDVX9G	high	395781	20	1818613	-0.0024	0.0063	56284	0.7004	0.5004	C	T	Total body bone mineral density	ebi-a-GCST005348	Total body bone mineral density	Total body bone mineral density || ||	TRUE	igd								0.000239014	94.6194
rs4814776	20	1921523	A	C	-0.03	0.0023	2e-40	0.3469	Mitochondrial DNA copy number	TRUE	reported	wDVX9G	high	395781	20	1921523	-0.0094	0.006	56284	0.1129	0.3647	A	C	Total body bone mineral density	ebi-a-GCST005348	Total body bone mineral density	Total body bone mineral density || ||	TRUE	igd								0.00042968	170.131
rs6105852	20	17955153	A	G	0.0221	0.0021	1.41e-25	0.5179	Mitochondrial DNA copy number	TRUE	reported	wDVX9G	high	395781	20	17955153	-0.0082	0.0056	56284	0.1487	0.5447	A	G	Total body bone mineral density	ebi-a-GCST005348	Total body bone mineral density	Total body bone mineral density || ||	TRUE	igd								0.00027975	110.75
rs2245946	22	43528240	A	G	0.0317	0.0023	9.378e-45	0.662	Mitochondrial DNA copy number	TRUE	reported	wDVX9G	high	395781	22	43528240	0.0086	0.0061	56284	0.1562	0.6538	A	G	Total body bone mineral density	ebi-a-GCST005348	Total body bone mineral density	Total body bone mineral density || ||	TRUE	igd								0.000479733	189.959
rs12148	22	50962208	G	T	-0.0139	0.0022	1.317e-10	0.6183	Mitochondrial DNA copy number	TRUE	reported	wDVX9G	high	395781	22	50962208	0.0055	0.0061	56284	0.3642	0.6132	G	T	Total body bone mineral density	ebi-a-GCST005348	Total body bone mineral density	Total body bone mineral density || ||	TRUE	igd								0.000100852	39.9192
rs13084580	3	39188182	T	C	0.0244	0.0033	2.189e-13	0.1014	Mitochondrial DNA copy number	TRUE	reported	wDVX9G	high	395781	3	39188182	0.0066	0.0089	56284	0.4587	0.1134	T	C	Total body bone mineral density	ebi-a-GCST005348	Total body bone mineral density	Total body bone mineral density || ||	TRUE	igd								0.000138114	54.6701
rs1354034	3	56849749	C	T	-0.0268	0.0022	2.049e-35	0.5994	Mitochondrial DNA copy number	TRUE	reported	wDVX9G	high	395781	3	56849749	0.0079	0.0059	56284	0.1765	0.579	C	T	Total body bone mineral density	ebi-a-GCST005348	Total body bone mineral density	Total body bone mineral density || ||	TRUE	igd								0.000374806	148.396
rs13088724	3	179152841	A	G	0.0175	0.0026	7.7e-12	0.2584	Mitochondrial DNA copy number	TRUE	reported	wDVX9G	high	395781	3	179152841	-0.0073	0.0069	56284	0.2915	0.2109	A	G	Total body bone mineral density	ebi-a-GCST005348	Total body bone mineral density	Total body bone mineral density || ||	TRUE	igd								0.000114452	45.303
rs4698839	4	102801941	T	C	0.0124	0.0022	9.467e-09	0.3807	Mitochondrial DNA copy number	TRUE	reported	wDVX9G	high	395781	4	102801941	-0.0048	0.0058	56284	0.4015	0.403	T	C	Total body bone mineral density	ebi-a-GCST005348	Total body bone mineral density	Total body bone mineral density || ||	TRUE	igd								8.02617e-05	31.7684
rs7705526	5	1285974	A	C	0.0178	0.0023	6.457e-15	0.337	Mitochondrial DNA copy number	TRUE	reported	wDVX9G	high	395781	5	1285974	0.0071	0.0071	56284	0.313	0.3292	A	C	Total body bone mineral density	ebi-a-GCST005348	Total body bone mineral density	Total body bone mineral density || ||	TRUE	igd								0.000151309	59.8938
rs1598010	5	72075374	A	G	0.0168	0.003	2.41e-08	0.1302	Mitochondrial DNA copy number	TRUE	reported	wDVX9G	high	395781	5	72075374	0.0127	0.0079	56284	0.1065	0.1649	A	G	Total body bone mineral density	ebi-a-GCST005348	Total body bone mineral density	Total body bone mineral density || ||	TRUE	igd								7.92295e-05	31.3598
rs114694170	5	88180196	C	T	0.0331	0.0045	3.041e-13	0.0537	Mitochondrial DNA copy number	TRUE	reported	wDVX9G	high	395781	5	88180196	-0.0277	0.0135	56284	0.0409996	0.0527	C	T	Total body bone mineral density	ebi-a-GCST005348	Total body bone mineral density	Total body bone mineral density || ||	TRUE	igd								0.000136684	54.1039
rs212930	6	25535636	G	A	0.0149	0.0025	3.184e-09	0.7763	Mitochondrial DNA copy number	TRUE	reported	wDVX9G	high	395781	6	25535636	-0.01	0.0069	56284	0.1473	0.7854	G	A	Total body bone mineral density	ebi-a-GCST005348	Total body bone mineral density	Total body bone mineral density || ||	TRUE	igd								8.97426e-05	35.5214
rs5745582	6	33546498	T	C	0.021	0.0028	3.455e-14	0.2247	Mitochondrial DNA copy number	TRUE	reported	wDVX9G	high	395781	6	33552707	0.0004	0.0073	56284	0.9605	0.1913	T	C	Total body bone mineral density	ebi-a-GCST005348	Total body bone mineral density	Total body bone mineral density || ||	TRUE	igd	TRUE	rs5745582	rs75080135	T	C	C	A	0.000142104	56.2497
rs4895441	6	135426573	G	A	0.0177	0.0024	8.309e-14	0.2734	Mitochondrial DNA copy number	TRUE	reported	wDVX9G	high	395781	6	135426573	0.0046	0.0065	56284	0.4781	0.2595	G	A	Total body bone mineral density	ebi-a-GCST005348	Total body bone mineral density	Total body bone mineral density || ||	TRUE	igd								0.000137407	54.3904
rs2304693	7	45148667	A	G	0.0181	0.0028	5.108e-11	0.161	Mitochondrial DNA copy number	TRUE	reported	wDVX9G	high	395781	7	45148667	-0.0112	0.0076	56284	0.1437	0.1645	A	G	Total body bone mineral density	ebi-a-GCST005348	Total body bone mineral density	Total body bone mineral density || ||	TRUE	igd								0.00010557	41.7868
rs11764390	7	80216205	A	G	-0.0122	0.0022	1.546e-08	0.4543	Mitochondrial DNA copy number	TRUE	reported	wDVX9G	high	395781	7	80216205	0.0041	0.0058	56284	0.4786	0.4592	A	G	Total body bone mineral density	ebi-a-GCST005348	Total body bone mineral density	Total body bone mineral density || ||	TRUE	igd								7.76937e-05	30.7519
rs445	7	92408370	T	C	0.0207	0.0036	8.85e-09	0.1143	Mitochondrial DNA copy number	TRUE	reported	wDVX9G	high	395781	7	92408370	-0.0092	0.0094	56284	0.3261	0.1148	T	C	Total body bone mineral density	ebi-a-GCST005348	Total body bone mineral density	Total body bone mineral density || ||	TRUE	igd								8.35304e-05	33.0623
rs342293	7	106372219	G	C	0.0283	0.0021	1.049e-40	0.4374	Mitochondrial DNA copy number	TRUE	reported	wDVX9G	high	395781	7	106372219	0.0007	0.0059	56284	0.9048	0.4414	G	C	Total body bone mineral density	ebi-a-GCST005348	Total body bone mineral density	Total body bone mineral density || ||	TRUE	igd								0.000458649	181.607
rs74750282	7	114744463	C	T	0.038	0.0038	4.287e-24	0.0646	Mitochondrial DNA copy number	TRUE	reported	wDVX9G	high	395781	7	114744463	-0.0086	0.0105	56284	0.4161	0.0794	C	T	Total body bone mineral density	ebi-a-GCST005348	Total body bone mineral density	Total body bone mineral density || ||	TRUE	igd								0.000252601	99.9995
rs6959832	7	135289854	A	G	-0.021	0.0021	2.099e-23	0.5139	Mitochondrial DNA copy number	TRUE	reported	wDVX9G	high	395781	7	135289854	0.0061	0.0057	56284	0.2816	0.4959	A	G	Total body bone mineral density	ebi-a-GCST005348	Total body bone mineral density	Total body bone mineral density || ||	TRUE	igd								0.000252601	99.9995
rs4284061	8	6878257	A	T	-0.0186	0.0022	2.966e-17	0.4573	Mitochondrial DNA copy number	TRUE	reported	wDVX9G	high	395781	8	6878257	-0.0028	0.006	56284	0.636601	0.4317	A	T	Total body bone mineral density	ebi-a-GCST005348	Total body bone mineral density	Total body bone mineral density || ||	TRUE	igd								0.000180571	71.479
rs4841132	8	9183596	G	A	-0.0212	0.0037	7.456e-09	0.9264	Mitochondrial DNA copy number	TRUE	reported	wDVX9G	high	395781	8	9183596	-0.0167	0.0101	56284	0.0996805	0.9122	G	A	Total body bone mineral density	ebi-a-GCST005348	Total body bone mineral density	Total body bone mineral density || ||	TRUE	igd								8.29425e-05	32.8296
rs2322718	8	27257787	G	T	0.0136	0.0021	1.531e-10	0.4533	Mitochondrial DNA copy number	TRUE	reported	wDVX9G	high	395781	8	27257787	-0.0014	0.0057	56284	0.8093	0.4355	G	T	Total body bone mineral density	ebi-a-GCST005348	Total body bone mineral density	Total body bone mineral density || ||	TRUE	igd								0.000105959	41.9408
rs385893	9	4763176	C	T	0.0153	0.0021	5.958e-13	0.493	Mitochondrial DNA copy number	TRUE	reported	wDVX9G	high	395781	9	4763176	0.0111	0.0058	56284	0.05426	0.5165	C	T	Total body bone mineral density	ebi-a-GCST005348	Total body bone mineral density	Total body bone mineral density || ||	TRUE	igd								0.000134101	53.0814
rs8176645	9	136149098	A	T	-0.0145	0.0026	3.064e-08	0.3966	Mitochondrial DNA copy number	TRUE	reported	wDVX9G	high	395781																							7.85779e-05	31.1019
rs3002416	X	39710195	T	C	-0.0107	0.0019	6.919e-09	0.4634	Mitochondrial DNA copy number	TRUE	reported	wDVX9G	high	395781	X	39710195	-0.0008	0.0115	56284	0.9478	0.4087	T	C	Total body bone mineral density	ebi-a-GCST005348	Total body bone mineral density	Total body bone mineral density || ||	TRUE	igd								8.01255e-05	31.7145
rs111701081	X	57174572	C	G	0.0126	0.0021	3.55e-09	0.2755	Mitochondrial DNA copy number	TRUE	reported	wDVX9G	high	395781	X	57174572	0.0173	0.0108	56284	0.1092	0.2864	C	G	Total body bone mineral density	ebi-a-GCST005348	Total body bone mineral density	Total body bone mineral density || ||	TRUE	igd								9.09511e-05	35.9998
rs73250616	X	99993277	C	T	0.0097	0.0017	2.577e-08	0.4922	Mitochondrial DNA copy number	TRUE	reported	wDVX9G	high	395781	X	99993277	-0.0006	0.0098	56284	0.9475	0.4488	C	T	Total body bone mineral density	ebi-a-GCST005348	Total body bone mineral density	Total body bone mineral density || ||	TRUE	igd								8.22536e-05	32.5569
rs392020	X	118601473	C	T	-0.0212	0.002	6.848e-26	0.7454	Mitochondrial DNA copy number	TRUE	reported	wDVX9G	high	395781	X	118601473	0.0327	0.0123	56284	0.00763097	0.7439	C	T	Total body bone mineral density	ebi-a-GCST005348	Total body bone mineral density	Total body bone mineral density || ||	TRUE	igd								0.000283814	112.359
