# Supplementary material for: MR Analysis Reveals No Causal Association Between Mitochondrial DNA Copy Number and Osteoporosis
Source: Research Square preprint supplement (doi:10.21203/rs.3.rs-5532195/v1), 2025-05-02
Supplement: Supplementary file 3 [file b1c40b7711302fcdb12c60de.xlsx]

## Sheet: Table S4
Table S4. Detailed information on instrumental variables used in the MR analysis of mtDNA-CN and forearm BMD
SNP	chr.exposure	pos.exposure	effect_allele.exposure	other_allele.exposure	beta.exposure	se.exposure	pval.exposure	eaf.exposure	exposure	mr_keep.exposure	pval_origin.exposure	id.exposure	reliability.exposure	samplesize.exposure	chr.outcome	pos.outcome	other_allele.outcome	effect_allele.outcome	eaf.outcome	beta.outcome	se.outcome	pval.outcome	samplesize.outcome	outcome	mr_keep.outcome	pval_origin.outcome	id.outcome	r2	F
rs2977608	1	768253	C	A	0.0236	0.0025	2.581e-21	0.7783	Mitochondrial DNA copy number	TRUE	reported	wDVX9G	high	395781														0.000225108	89.1131
rs1569419	1	2996602	C	T	0.0189	0.0025	6.87e-14	0.7555	Mitochondrial DNA copy number	TRUE	reported	wDVX9G	high	395781	1	2996602	T	C	0.232458	0.019857	0.01823	0.285484	8143	Forearm bone mineral density	TRUE	reported	wX5ZYv	0.000144386	57.1533
rs3766744	1	12043717	A	G	-0.0179	0.0021	2.908e-17	0.4722	Mitochondrial DNA copy number	TRUE	reported	wDVX9G	high	395781	1	12043717	G	A	0.494749	0.007846	0.015687	0.623888	8143	Forearm bone mineral density	TRUE	reported	wX5ZYv	0.000183541	72.655
rs72660908	1	25583610	G	C	0.0457	0.0021	8.25e-101	0.3877	Mitochondrial DNA copy number	TRUE	reported	wDVX9G	high	395781	1	25583610	C	G	0.695943	-0.004655	0.016089	0.776637	8143	Forearm bone mineral density	TRUE	reported	wX5ZYv	0.00119514	473.578
rs182346769	1	25622199	A	G	0.0213	0.0027	7.869e-15	0.0656	Mitochondrial DNA copy number	TRUE	reported	wDVX9G	high	395781	1	25622199	G	A	0.942959	-0.03007	0.034146	0.38797	8143	Forearm bone mineral density	TRUE	reported	wX5ZYv	0.00015722	62.2343
rs2274319	1	156450873	C	T	-0.0139	0.0022	4.087e-10	0.675	Mitochondrial DNA copy number	TRUE	reported	wDVX9G	high	395781	1	156450873	T	C	0.344391	-0.023897	0.016504	0.155661	8143	Forearm bone mineral density	TRUE	reported	wX5ZYv	0.000100852	39.9192
rs2038480	1	171939641	T	A	0.0162	0.0027	1.389e-09	0.832	Mitochondrial DNA copy number	TRUE	reported	wDVX9G	high	395781	1	171939641	A	T	0.201193	0.018222	0.019795	0.366728	8143	Forearm bone mineral density	TRUE	reported	wX5ZYv	9.09511e-05	35.9998
rs9425601	1	172377262	A	G	0.0125	0.0023	3.039e-08	0.3171	Mitochondrial DNA copy number	TRUE	reported	wDVX9G	high	395781	1	172377262	G	A	0.677407	-0.036953	0.016456	0.027695	8143	Forearm bone mineral density	TRUE	reported	wX5ZYv	7.46237e-05	29.5367
rs10749636	1	248020448	A	G	0.0155	0.0025	5.434e-10	0.7694	Mitochondrial DNA copy number	TRUE	reported	wDVX9G	high	395781	1	248020448	G	A	0.285998	0.026966	0.018302	0.148538	8143	Forearm bone mineral density	TRUE	reported	wX5ZYv	9.7115e-05	38.4398
rs12247015	10	60145079	G	A	0.0337	0.0021	1.276e-55	0.4245	Mitochondrial DNA copy number	TRUE	reported	wDVX9G	high	395781	10	60145079	A	G	0.568735	-0.009593	0.015612	0.546861	8143	Forearm bone mineral density	TRUE	reported	wX5ZYv	0.000650255	257.525
rs7896518	10	65104500	G	A	-0.0456	0.0022	9.53e-99	0.4354	Mitochondrial DNA copy number	TRUE	reported	wDVX9G	high	395781	10	65104500	A	G	0.590215	0.028503	0.016499	0.090351	8143	Forearm bone mineral density	TRUE	reported	wX5ZYv	0.00108432	429.618
rs57066921	10	102752345	G	T	-0.1081	0.0081	8.984e-41	0.0189	Mitochondrial DNA copy number	TRUE	reported	wDVX9G	high	395781	10	102752345	T	G	0.974224	0.052545	0.067216	0.443389	8143	Forearm bone mineral density	TRUE	reported	wX5ZYv	0.000449812	178.106
rs701834	10	102761801	T	C	-0.0254	0.0026	1.122e-22	0.1839	Mitochondrial DNA copy number	TRUE	reported	wDVX9G	high	395781	10	102761801	C	T	0.731106	-0.022953	0.019127	0.239303	8143	Forearm bone mineral density	TRUE	reported	wX5ZYv	0.00024108	95.4374
rs3961455	10	104421471	A	G	0.0142	0.0024	4.305e-09	0.2803	Mitochondrial DNA copy number	TRUE	reported	wDVX9G	high	395781	10	104421471	G	A	0.763405	-0.044016	0.018413	0.01913	8143	Forearm bone mineral density	TRUE	reported	wX5ZYv	8.84425e-05	35.0068
rs10835540	11	4071429	A	T	0.0184	0.0023	5.74e-16	0.333	Mitochondrial DNA copy number	TRUE	reported	wDVX9G	high	395781	11	4071429	T	A	0.71432	-0.018914	0.016879	0.271855	8143	Forearm bone mineral density	TRUE	reported	wX5ZYv	0.000161679	63.9997
rs11064074	12	6281039	T	C	0.0197	0.0021	4.866e-20	0.4294	Mitochondrial DNA copy number	TRUE	reported	wDVX9G	high	395781	12	6281039	C	T	0.59642	-0.016604	0.015834	0.303842	8143	Forearm bone mineral density	TRUE	reported	wX5ZYv	0.000222301	88.0018
rs5012419	12	19105915	G	A	0.0247	0.0022	2.664e-29	0.5915	Mitochondrial DNA copy number	TRUE	reported	wDVX9G	high	395781	12	19105915	A	G	0.424901	-0.038399	0.016077	0.019209	8143	Forearm bone mineral density	TRUE	reported	wX5ZYv	0.000318387	126.051
rs1127787	12	27867727	A	G	-0.0159	0.0028	1.493e-08	0.173	Mitochondrial DNA copy number	TRUE	reported	wDVX9G	high	395781	12	27867727	G	A	0.850358	-0.008912	0.020812	0.674654	8143	Forearm bone mineral density	TRUE	reported	wX5ZYv	8.14682e-05	32.246
rs2015599	12	29435480	A	G	0.0123	0.0021	6.031e-09	0.4274	Mitochondrial DNA copy number	TRUE	reported	wDVX9G	high	395781	12	29435480	G	A	0.509149	0.017876	0.015566	0.260116	8143	Forearm bone mineral density	TRUE	reported	wX5ZYv	8.6672e-05	34.3059
rs12426673	12	109490296	T	G	-0.0141	0.0021	4.028e-11	0.6233	Mitochondrial DNA copy number	TRUE	reported	wDVX9G	high	395781	12	109490296	G	T	0.432299	-0.007492	0.015809	0.642205	8143	Forearm bone mineral density	TRUE	reported	wX5ZYv	0.000113893	45.0814
rs192890685	12	120092963	T	C	0.0247	0.0044	1.932e-08	0.0557	Mitochondrial DNA copy number	TRUE	reported	wDVX9G	high	395781	12	120092963	C	T	0.950278	0.076087	0.032701	0.022547	8143	Forearm bone mineral density	TRUE	reported	wX5ZYv	7.96158e-05	31.5128
rs11553699	12	122216910	G	A	0.0445	0.0032	1.451e-43	0.1193	Mitochondrial DNA copy number	TRUE	reported	wDVX9G	high	395781	12	122216910	A	G	0.897216	0.035582	0.0238	0.142649	8143	Forearm bone mineral density	TRUE	reported	wX5ZYv	0.000488374	193.383
rs1760940	14	20938251	C	A	0.0263	0.0024	5.196e-27	0.2455	Mitochondrial DNA copy number	TRUE	reported	wDVX9G	high	395781	14	20938251	A	C	0.774702	-0.013208	0.017868	0.468565	8143	Forearm bone mineral density	TRUE	reported	wX5ZYv	0.000303321	120.084
rs72698722	14	101181881	T	C	-0.0192	0.0027	1.249e-12	0.1938	Mitochondrial DNA copy number	TRUE	reported	wDVX9G	high	395781	14	101181881	C	T	0.810979	0.004291	0.019872	0.832324	8143	Forearm bone mineral density	TRUE	reported	wX5ZYv	0.000127751	50.5676
rs289713	16	57006829	A	T	-0.0149	0.0027	4.136e-08	0.7843	Mitochondrial DNA copy number	TRUE	reported	wDVX9G	high	395781	16	57006829	T	A	0.245664	0.034451	0.019733	0.086938	8143	Forearm bone mineral density	TRUE	reported	wX5ZYv	7.69408e-05	30.4539
rs2290507	17	18139089	A	G	0.0223	0.0031	3.639e-13	0.1292	Mitochondrial DNA copy number	TRUE	reported	wDVX9G	high	395781	17	18139089	G	A	0.856165	-0.015908	0.022805	0.494007	8143	Forearm bone mineral density	TRUE	reported	wX5ZYv	0.00013073	51.7469
rs200309755	17	27845774	T	C	-0.018	0.0022	1.906e-16	0.5229	Mitochondrial DNA copy number	TRUE	reported	wDVX9G	high	395781	17	27845774	C	T	0.525776	0.009038	0.027615	0.748348	8143	Forearm bone mineral density	TRUE	reported	wX5ZYv	0.000169111	66.9418
rs17850455	17	62476451	G	C	0.091	0.0104	1.813e-18	0.0129	Mitochondrial DNA copy number	TRUE	reported	wDVX9G	high	395781	17	62476451	C	G	0.991965	-0.081611	0.087524	0.360674	8143	Forearm bone mineral density	TRUE	reported	wX5ZYv	0.000193409	76.5621
rs77261872	18	42107662	T	C	0.0262	0.0032	2.281e-16	0.1431	Mitochondrial DNA copy number	TRUE	reported	wDVX9G	high	395781	18	42107662	C	T	0.88576	-0.025988	0.023343	0.274984	8143	Forearm bone mineral density	TRUE	reported	wX5ZYv	0.000169346	67.0348
rs28665408	18	67516846	C	A	0.0157	0.0021	2.11e-13	0.9761	Mitochondrial DNA copy number	TRUE	reported	wDVX9G	low	395781	18	67516846	A	C	0.446301	0.006667	0.016667	0.694888	8143	Forearm bone mineral density	TRUE	reported	wX5ZYv	0.000141203	55.8931
rs11085147	19	5711930	T	C	0.0756	0.0036	1.54e-95	0.0865	Mitochondrial DNA copy number	TRUE	reported	wDVX9G	high	395781	19	5711930	C	T	0.933095	-0.015597	0.026624	0.565803	8143	Forearm bone mineral density	TRUE	reported	wX5ZYv	0.00111301	440.998
rs6511720	19	11202306	T	G	0.0192	0.0033	4.081e-09	0.1103	Mitochondrial DNA copy number	TRUE	reported	wDVX9G	high	395781	19	11202306	G	T	0.887271	0.008111	0.023761	0.737859	8143	Forearm bone mineral density	TRUE	reported	wX5ZYv	8.55229e-05	33.8511
rs56069439	19	17393925	A	C	-0.0274	0.0023	2.299e-32	0.2604	Mitochondrial DNA copy number	TRUE	reported	wDVX9G	high	395781	19	17393925	C	A	0.758711	0.032718	0.016927	0.058068	8143	Forearm bone mineral density	TRUE	reported	wX5ZYv	0.000358455	141.92
rs1065853	19	45413233	T	G	0.0388	0.0039	1.585e-23	0.0626	Mitochondrial DNA copy number	TRUE	reported	wDVX9G	high	395781	19	45413233	G	T	0.914081	0.014816	0.028986	0.616257	8143	Forearm bone mineral density	TRUE	reported	wX5ZYv	0.000250018	98.9765
rs1613662	19	55536595	A	G	-0.0167	0.0028	3.9e-09	0.8549	Mitochondrial DNA copy number	TRUE	reported	wDVX9G	high	395781														8.98717e-05	35.5725
rs62641680	2	74166053	A	G	-0.0903	0.0063	4.634e-47	0.0249	Mitochondrial DNA copy number	TRUE	reported	wDVX9G	high	395781	2	74166053	G	A	0.981146	-0.013722	0.052255	0.796848	8143	Forearm bone mineral density	TRUE	reported	wX5ZYv	0.000518817	205.443
rs74874677	2	74177777	G	A	-0.0819	0.0071	3.617e-31	0.0298	Mitochondrial DNA copy number	TRUE	reported	wDVX9G	high	395781	2	74177777	A	G	0.981862	0.034295	0.051064	0.510313	8143	Forearm bone mineral density	TRUE	reported	wX5ZYv	0.000336086	133.06
rs12052715	2	160677375	G	C	-0.0133	0.0024	1.72e-08	0.6938	Mitochondrial DNA copy number	TRUE	reported	wDVX9G	high	395781	2	160677375	C	G	0.277168	-0.020026	0.017375	0.258387	8143	Forearm bone mineral density	TRUE	reported	wX5ZYv	7.75876e-05	30.7099
rs78909033	2	241510903	A	G	-0.021	0.0031	1.003e-11	0.1233	Mitochondrial DNA copy number	TRUE	reported	wDVX9G	high	395781	2	241510903	G	A	0.894033	0.07075	0.02237	0.001936	8143	Forearm bone mineral density	TRUE	reported	wX5ZYv	0.000115934	45.8895
rs2263663	20	1541301	T	C	0.02	0.0024	1.966e-16	0.2296	Mitochondrial DNA copy number	TRUE	reported	wDVX9G	high	395781	20	1541301	C	T	0.80533	0.007239	0.017678	0.688048	8143	Forearm bone mineral density	TRUE	reported	wX5ZYv	0.000175431	69.4441
rs156355	20	1818613	C	T	0.0214	0.0022	6.411e-23	0.496	Mitochondrial DNA copy number	TRUE	reported	wDVX9G	high	395781	20	1818613	T	C	0.445028	0.012728	0.015952	0.434009	8143	Forearm bone mineral density	TRUE	reported	wX5ZYv	0.000239014	94.6194
rs4814776	20	1921523	A	C	-0.03	0.0023	2e-40	0.3469	Mitochondrial DNA copy number	TRUE	reported	wDVX9G	high	395781	20	1921523	C	A	0.568735	0.01912	0.016509	0.256112	8143	Forearm bone mineral density	TRUE	reported	wX5ZYv	0.00042968	170.131
rs6105852	20	17955153	A	G	0.0221	0.0021	1.41e-25	0.5179	Mitochondrial DNA copy number	TRUE	reported	wDVX9G	high	395781	20	17955153	G	A	0.435879	0.028235	0.015551	0.07504	8143	Forearm bone mineral density	TRUE	reported	wX5ZYv	0.00027975	110.75
rs2245946	22	43528240	A	G	0.0317	0.0023	9.378e-45	0.662	Mitochondrial DNA copy number	TRUE	reported	wDVX9G	high	395781	22	43528240	G	A	0.391329	-0.031103	0.017291	0.077787	8143	Forearm bone mineral density	TRUE	reported	wX5ZYv	0.000479733	189.959
rs12148	22	50962208	G	T	-0.0139	0.0022	1.317e-10	0.6183	Mitochondrial DNA copy number	TRUE	reported	wDVX9G	high	395781	22	50962208	T	G	0.368417	-0.001288	0.016373	0.938491	8143	Forearm bone mineral density	TRUE	reported	wX5ZYv	0.000100852	39.9192
rs13084580	3	39188182	T	C	0.0244	0.0033	2.189e-13	0.1014	Mitochondrial DNA copy number	TRUE	reported	wDVX9G	high	395781	3	39188182	C	T	0.884487	-0.007859	0.024611	0.75427	8143	Forearm bone mineral density	TRUE	reported	wX5ZYv	0.000138114	54.6701
rs1354034	3	56849749	C	T	-0.0268	0.0022	2.049e-35	0.5994	Mitochondrial DNA copy number	TRUE	reported	wDVX9G	high	395781	3	56849749	T	C	0.459984	0.027086	0.015947	0.095912	8143	Forearm bone mineral density	TRUE	reported	wX5ZYv	0.000374806	148.396
rs13088724	3	179152841	A	G	0.0175	0.0026	7.7e-12	0.2584	Mitochondrial DNA copy number	TRUE	reported	wDVX9G	high	395781	3	179152841	G	A	0.811854	-0.001696	0.018374	0.927857	8143	Forearm bone mineral density	TRUE	reported	wX5ZYv	0.000114452	45.303
rs4698839	4	102801941	T	C	0.0124	0.0022	9.467e-09	0.3807	Mitochondrial DNA copy number	TRUE	reported	wDVX9G	high	395781	4	102801941	C	T	0.579554	0.019401	0.016169	0.239365	8143	Forearm bone mineral density	TRUE	reported	wX5ZYv	8.02617e-05	31.7684
rs7705526	5	1285974	A	C	0.0178	0.0023	6.457e-15	0.337	Mitochondrial DNA copy number	TRUE	reported	wDVX9G	high	395781	5	1285974	C	A	0.674065	0.031406	0.017467	0.077905	8143	Forearm bone mineral density	TRUE	reported	wX5ZYv	0.000151309	59.8938
rs1598010	5	72075374	A	G	0.0168	0.003	2.41e-08	0.1302	Mitochondrial DNA copy number	TRUE	reported	wDVX9G	high	395781	5	72075374	G	A	0.81249	0.014194	0.021738	0.522036	8143	Forearm bone mineral density	TRUE	reported	wX5ZYv	7.92295e-05	31.3598
rs114694170	5	88180196	C	T	0.0331	0.0045	3.041e-13	0.0537	Mitochondrial DNA copy number	TRUE	reported	wDVX9G	high	395781	5	88180196	T	C	0.957836	-0.00083	0.034751	0.981315	8143	Forearm bone mineral density	TRUE	reported	wX5ZYv	0.000136684	54.1039
rs212930	6	25535636	G	A	0.0149	0.0025	3.184e-09	0.7763	Mitochondrial DNA copy number	TRUE	reported	wDVX9G	high	395781	6	25535636	A	G	0.19292	0.006025	0.01933	0.759909	8143	Forearm bone mineral density	TRUE	reported	wX5ZYv	8.97426e-05	35.5214
rs5745582	6	33546498	T	C	0.021	0.0028	3.455e-14	0.2247	Mitochondrial DNA copy number	TRUE	reported	wDVX9G	high	395781	6	33546498	C	T	0.783294	0.033178	0.019981	0.103578	8143	Forearm bone mineral density	TRUE	reported	wX5ZYv	0.000142104	56.2497
rs4895441	6	135426573	G	A	0.0177	0.0024	8.309e-14	0.2734	Mitochondrial DNA copy number	TRUE	reported	wDVX9G	high	395781	6	135426573	A	G	0.767701	0.006256	0.017556	0.72679	8143	Forearm bone mineral density	TRUE	reported	wX5ZYv	0.000137407	54.3904
rs2304693	7	45148667	A	G	0.0181	0.0028	5.108e-11	0.161	Mitochondrial DNA copy number	TRUE	reported	wDVX9G	high	395781	7	45148667	G	A	0.843994	-0.029896	0.020377	0.15027	8143	Forearm bone mineral density	TRUE	reported	wX5ZYv	0.00010557	41.7868
rs11764390	7	80216205	A	G	-0.0122	0.0022	1.546e-08	0.4543	Mitochondrial DNA copy number	TRUE	reported	wDVX9G	high	395781	7	80216205	G	A	0.50366	-0.027557	0.016037	0.092021	8143	Forearm bone mineral density	TRUE	reported	wX5ZYv	7.76937e-05	30.7519
rs445	7	92408370	T	C	0.0207	0.0036	8.85e-09	0.1143	Mitochondrial DNA copy number	TRUE	reported	wDVX9G	high	395781	7	92408370	C	T	0.868019	0.023581	0.025149	0.357885	8143	Forearm bone mineral density	TRUE	reported	wX5ZYv	8.35304e-05	33.0623
rs342293	7	106372219	G	C	0.0283	0.0021	1.049e-40	0.4374	Mitochondrial DNA copy number	TRUE	reported	wDVX9G	high	395781	7	106372219	C	G	0.5786	0.00506	0.020755	0.811074	8143	Forearm bone mineral density	TRUE	reported	wX5ZYv	0.000458649	181.607
rs74750282	7	114744463	C	T	0.038	0.0038	4.287e-24	0.0646	Mitochondrial DNA copy number	TRUE	reported	wDVX9G	high	395781	7	114744463	T	C	0.940573	0.046958	0.028539	0.106673	8143	Forearm bone mineral density	TRUE	reported	wX5ZYv	0.000252601	99.9995
rs6959832	7	135289854	A	G	-0.021	0.0021	2.099e-23	0.5139	Mitochondrial DNA copy number	TRUE	reported	wDVX9G	high	395781	7	135289854	G	A	0.528401	0.003924	0.01568	0.80614	8143	Forearm bone mineral density	TRUE	reported	wX5ZYv	0.000252601	99.9995
rs4284061	8	6878257	A	T	-0.0186	0.0022	2.966e-17	0.4573	Mitochondrial DNA copy number	TRUE	reported	wDVX9G	high	395781	8	6878257	T	A	0.51066	0.020623	0.017547	0.249142	8143	Forearm bone mineral density	TRUE	reported	wX5ZYv	0.000180571	71.479
rs4841132	8	9183596	G	A	-0.0212	0.0037	7.456e-09	0.9264	Mitochondrial DNA copy number	TRUE	reported	wDVX9G	high	395781	8	9183596	A	G	0.091885	0.039102	0.028503	0.178667	8143	Forearm bone mineral density	TRUE	reported	wX5ZYv	8.29425e-05	32.8296
rs2322718	8	27257787	G	T	0.0136	0.0021	1.531e-10	0.4533	Mitochondrial DNA copy number	TRUE	reported	wDVX9G	high	395781	8	27257787	T	G	0.584726	0.025026	0.015774	0.119787	8143	Forearm bone mineral density	TRUE	reported	wX5ZYv	0.000105959	41.9408
rs385893	9	4763176	C	T	0.0153	0.0021	5.958e-13	0.493	Mitochondrial DNA copy number	TRUE	reported	wDVX9G	high	395781	9	4763176	T	C	0.493795	0.006767	0.015376	0.666101	8143	Forearm bone mineral density	TRUE	reported	wX5ZYv	0.000134101	53.0814
rs8176645	9	136149098	A	T	-0.0145	0.0026	3.064e-08	0.3966	Mitochondrial DNA copy number	TRUE	reported	wDVX9G	high	395781	9	136149098	T	A	0.640175	-0.049116	0.021302	0.023796	8143	Forearm bone mineral density	TRUE	reported	wX5ZYv	7.85779e-05	31.1019
rs3002416	X	39710195	T	C	-0.0107	0.0019	6.919e-09	0.4634	Mitochondrial DNA copy number	TRUE	reported	wDVX9G	high	395781														8.01255e-05	31.7145
rs111701081	X	57174572	C	G	0.0126	0.0021	3.55e-09	0.2755	Mitochondrial DNA copy number	TRUE	reported	wDVX9G	high	395781														9.09511e-05	35.9998
rs73250616	X	99993277	C	T	0.0097	0.0017	2.577e-08	0.4922	Mitochondrial DNA copy number	TRUE	reported	wDVX9G	high	395781														8.22536e-05	32.5569
rs392020	X	118601473	C	T	-0.0212	0.002	6.848e-26	0.7454	Mitochondrial DNA copy number	TRUE	reported	wDVX9G	high	395781														0.000283814	112.359
